# Supplementary material for: Tethering of the Conserved piggyBac Transposase Fusion Protein CSB-PGBD3 to Chromosomal AP-1 Proteins Regulates Expression of Nearby Genes in Humans
Source: PLoS Genet. 2012 Sep 27;8(9):e1002972. doi: 10.1371/journal.pgen.1002972 (PMC3459987; doi:10.1371/journal.pgen.1002972)
Supplement: Table S3 — Genomic locations of TRE, TEAD1, and CTCF motifs identified by MEME within 50 bp of CSB-PGBD3 peak summits in the hg18 genome. (XLS) [file pgen.1002972.s008.xls]

## Sheet: Table S3A TRE
Table S3A TRE motif locations (hg18) found by MEME within 50 bp of CSB-PGBD3 peak summits
Chromosome	Start	End	Strand	TRE Motif	p-Value	CSB-PGBD3 Peak	Distance from peak summit
chr1	7976962	7976969	+	TGACTAA	9.56e-05	Peak_2	0
chr1	9749539	9749546	+	TGACTAA	5.8e-05	Peak_3	15
chr1	51796642	51796649	+	TGACTCA	2.65e-05	Peak_14	3
chr1	51875570	51875577	-	TGATTCA	9.56e-05	Peak_15	17
chr1	53386579	53386586	-	TGAGTCA	6.59e-05	Peak_16	39
chr1	55484225	55484232	+	TGACTAA	0.000143	Peak_17	0
chr1	59381623	59381630	-	TGACTCA	2.65e-05	Peak_19	17
chr1	64581879	64581886	+	TGACTAA	0.000115	Peak_22	9
chr1	79070221	79070228	+	TGACTCA	5.8e-05	Peak_40	37
chr1	84604087	84604094	-	TGACTCA	5.11e-06	Peak_41	37
chr1	85178971	85178978	-	TGAGTAA	0.000209	Peak_43	5
chr1	85558752	85558759	+	TGAGTCA	1.11e-05	Peak_45	21
chr1	94042680	94042687	+	TGACTAA	0.000115	Peak_55	23
chr1	94564158	94564165	-	TGAGTAA	0.000209	Peak_57	8
chr1	96600907	96600914	+	TGATTCA	2.65e-05	Peak_58	33
chr1	100860374	100860381	+	TGATTCA	4.94e-05	Peak_63	30
chr1	100869529	100869536	+	TGAGTAA	0.000105	Peak_64	36
chr1	114664910	114664917	+	TGATTCA	4.94e-05	Peak_69	11
chr1	115406887	115406894	-	TGACTCA	3.65e-06	Peak_70	32
chr1	119623735	119623742	+	TGAGTCA	4.94e-05	Peak_75	18
chr1	156246424	156246431	-	TGAGTAA	0.000221	Peak_79	35
chr1	165372328	165372335	-	TGAGTCA	1.11e-05	Peak_82	9
chr1	171169813	171169820	-	TGACTCA	6.81e-06	Peak_83	40
chr1	201794311	201794318	-	TGACTCA	4.94e-05	Peak_87	24
chr1	216700077	216700084	+	TGACTCA	2.12e-05	Peak_98	15
chr1	216720806	216720813	+	TGACTCA	9.74e-06	Peak_99	39
chr1	219678089	219678096	+	TGACTAA	0.000105	Peak_103	40
chr1	219680103	219680110	-	TGACTCA	1.78e-05	Peak_104	14
chr1	220611480	220611487	-	TGATTCA	4.94e-05	Peak_106	3
chr1	222797353	222797360	+	TGAGTCA	7.71e-05	Peak_109	25
chr1	225075731	225075738	+	TGACTCA	3.65e-06	Peak_112	11
chr1	228307307	228307314	-	TGATTCA	0.000184	Peak_114	1
chr1	234140764	234140771	-	TGACTAA	5.8e-05	Peak_121	4
chr1	238261086	238261093	-	TGATTCA	5.8e-05	Peak_127	0
chr1	242157003	242157010	+	TGAGTCA	0.000131	Peak_128	30
chr1	242394110	242394117	-	TGAGTCA	1.54e-05	Peak_129	42
chr1	244369815	244369822	-	TGATTCA	4.15e-05	Peak_133	4
chr1	244733368	244733375	+	TGATTAA	0.000242	Peak_135	8
chr10	1531138	1531145	-	TGAGTAA	0.000115	Peak_1232	23
chr10	3230006	3230013	-	TGACTCA	7.71e-05	Peak_1234	7
chr10	6831104	6831111	-	TGACTCA	3.65e-06	Peak_1238	0
chr10	8220612	8220619	-	TGACTCA	6.81e-06	Peak_1243	29
chr10	8388865	8388872	-	TGAGTCA	2.12e-05	Peak_1245	10
chr10	13948106	13948113	-	TGAGTCA	2.65e-05	Peak_1250	0
chr10	14487306	14487313	-	TGATTCA	0.000184	Peak_1256	1
chr10	17091632	17091639	-	TGATTCA	4.15e-05	Peak_1260	12
chr10	17105633	17105640	+	TGACTCA	6.81e-06	Peak_1261	10
chr10	17197810	17197817	-	TGATTCA	0.000184	Peak_1263	30
chr10	17737751	17737758	-	TGACTCA	6.81e-06	Peak_1268	41
chr10	18319494	18319501	+	TGAGTCA	1.54e-05	Peak_1270	7
chr10	19042246	19042253	-	TGAGTCA	1.78e-05	Peak_1271	16
chr10	22044694	22044701	+	TGACTCA	5.8e-05	Peak_1275	18
chr10	25226472	25226479	-	TGACTCA	9.56e-05	Peak_1279	41
chr10	26736468	26736475	+	TGAGTCA	4.94e-05	Peak_1280	16
chr10	29988068	29988075	+	TGACTCA	3.27e-05	Peak_1286	18
chr10	30113452	30113459	-	TGACTCA	1.64e-06	Peak_1289	20
chr10	33463181	33463188	-	TGAGTCA	9.74e-06	Peak_1298	18
chr10	33592643	33592650	-	TGACTCA	0.000229	Peak_1299	22
chr10	33620290	33620297	+	TGACTCA	1.78e-05	Peak_1300	22
chr10	33695041	33695048	+	TGACTCA	9.74e-06	Peak_1301	13
chr10	43171545	43171552	-	TGACTCA	4.94e-05	Peak_1309	19
chr10	44116706	44116713	-	TGAATCA	0.000323	Peak_1314	22
chr10	44673253	44673260	-	TGACTCA	1.54e-05	Peak_1316	23
chr10	46469924	46469931	-	TGACTCA	0.000131	Peak_1319	22
chr10	47952349	47952356	-	TGACTAA	9.56e-05	Peak_1320	3
chr10	61844692	61844699	+	TGACTAA	6.59e-05	Peak_1328	0
chr10	69529736	69529743	-	TGATTCA	0.000131	Peak_1332	29
chr10	73601028	73601035	-	TGACTCA	7.71e-05	Peak_1334	2
chr10	75396134	75396141	-	TGACTCA	6.59e-05	Peak_1337	33
chr10	78593921	78593928	+	TGACTCA	6.59e-05	Peak_1340	5
chr10	78935903	78935910	-	TGATTCA	8.54e-05	Peak_1343	11
chr10	78943648	78943655	+	TGACTCA	0.000115	Peak_1344	5
chr10	92718657	92718664	+	TGATTCA	5.8e-05	Peak_1350	34
chr10	101042137	101042144	-	TGACTCA	7.71e-05	Peak_1352	0
chr10	105254274	105254281	-	TGAGTCA	1.78e-05	Peak_1354	22
chr10	115076076	115076083	+	TGACTCA	6.81e-06	Peak_1360	29
chr10	118638221	118638228	+	TGAGTCA	1.54e-05	Peak_1362	0
chr10	124604361	124604368	+	TGACTAA	0.000143	Peak_1366	26
chr10	128063000	128063007	+	TGATTCA	0.000159	Peak_1367	0
chr11	14400623	14400630	+	TGATTCA	0.000131	Peak_1372	30
chr11	36127963	36127970	+	TGACTCA	7.71e-05	Peak_1381	20
chr11	58391760	58391767	+	TGACTAA	0.000131	Peak_1387	10
chr11	59097411	59097418	+	TGACTAA	0.000143	Peak_1389	12
chr11	59230981	59230988	+	TGACTAA	0.000265	Peak_1391	34
chr11	63192171	63192178	+	TGACTCA	9.74e-06	Peak_1394	23
chr11	64799407	64799414	+	TGAGTCA	0.000131	Peak_1396	18
chr11	64996292	64996299	+	TGACTCA	8.18e-07	Peak_1399	7
chr11	68875570	68875577	-	TGACTCA	6.81e-06	Peak_1404	2
chr11	73524028	73524035	-	TGAGTCA	1.11e-05	Peak_1411	14
chr11	73527458	73527465	-	TGACTCA	1.64e-06	Peak_1412	23
chr11	82369252	82369259	-	TGAGTAA	9.56e-05	Peak_1423	12
chr11	84206923	84206930	-	TGAGTAA	9.56e-05	Peak_1424	28
chr11	85107879	85107886	+	TGACTAA	0.000242	Peak_1426	6
chr11	85561659	85561666	-	TGACTCA	6.81e-06	Peak_1431	32
chr11	85913007	85913014	-	TGACTCA	6.81e-06	Peak_1434	19
chr11	86021624	86021631	-	TGACTCA	3.27e-05	Peak_1436	18
chr11	87908948	87908955	+	TGATTCA	5.8e-05	Peak_1444	27
chr11	88868961	88868968	+	TGACTCA	1.64e-06	Peak_1445	39
chr11	90536537	90536544	+	TGACTCA	1.64e-06	Peak_1446	33
chr11	92373491	92373498	+	TGACTCA	9.74e-06	Peak_1449	25
chr11	94105087	94105094	-	TGACTCA	6.59e-05	Peak_1451	12
chr11	101488156	101488163	+	TGACTAA	5.8e-05	Peak_1459	19
chr11	101721860	101721867	-	TGACTAA	0.000159	Peak_1460	37
chr11	102985487	102985494	-	TGAGTAA	0.000209	Peak_1462	3
chr11	104149120	104149127	+	TGACTAA	6.59e-05	Peak_1464	29
chr11	105313507	105313514	+	TGAGTCA	1.11e-05	Peak_1465	6
chr11	107081176	107081183	-	TGACTCA	5.8e-05	Peak_1466	33
chr11	107992665	107992672	-	TGATTCA	0.000105	Peak_1467	7
chr11	108349553	108349560	-	TGACTCA	6.81e-06	Peak_1468	34
chr11	110907797	110907804	-	TGATTCA	0.000131	Peak_1470	0
chr11	112760565	112760572	-	TGAGTCA	9.74e-06	Peak_1474	42
chr11	113671198	113671205	+	TGACTAA	4.94e-05	Peak_1475	37
chr11	113730238	113730245	-	TGATTCA	0.000197	Peak_1476	29
chr11	114865040	114865047	+	TGACTCA	4.15e-05	Peak_1478	34
chr11	116387342	116387349	-	TGACTCA	5.11e-06	Peak_1481	15
chr11	118594591	118594598	-	TGACTAA	0.000115	Peak_1484	5
chr11	118970829	118970836	-	TGAGTCA	2.65e-05	Peak_1485	8
chr11	119808200	119808207	-	TGATTCA	0.000251	Peak_1487	32
chr11	121308859	121308866	-	TGAGTAA	0.000209	Peak_1488	6
chr11	121421368	121421375	-	TGATTCA	7.71e-05	Peak_1490	0
chr11	121556427	121556434	+	TGACTCA	8.18e-07	Peak_1495	39
chr11	121565331	121565338	-	TGAGTCA	2.65e-05	Peak_1496	29
chr11	127585860	127585867	+	TGAGTCA	4.94e-05	Peak_1500	37
chr12	6350674	6350681	+	TGATTCA	9.56e-05	Peak_1508	14
chr12	10678542	10678549	+	TGAGTAA	0.000115	Peak_1517	36
chr12	12847625	12847632	+	TGACTCA	3.27e-05	Peak_1520	33
chr12	12848914	12848921	+	TGACTAA	4.94e-05	Peak_1521	23
chr12	13020765	13020772	-	TGATTCA	0.000131	Peak_1526	40
chr12	13250703	13250710	+	TGACTCA	2.65e-05	Peak_1527	20
chr12	14880605	14880612	+	TGACTCA	2.12e-05	Peak_1530	0
chr12	15744965	15744972	-	TGAGTCA	2.65e-05	Peak_1531	9
chr12	18427696	18427703	+	TGAGTAA	0.000209	Peak_1533	26
chr12	19318322	19318329	+	TGAGTCA	0.000242	Peak_1536	26
chr12	20014454	20014461	-	TGAGTAA	0.000171	Peak_1537	29
chr12	25738308	25738315	-	TGAGTAA	0.000221	Peak_1540	34
chr12	26002310	26002317	-	TGATTCA	5.8e-05	Peak_1542	35
chr12	26674871	26674878	-	TGATTCA	0.000131	Peak_1544	14
chr12	26735806	26735813	+	TGAGTCA	0.000209	Peak_1545	7
chr12	27121296	27121303	-	TGAGTAA	0.000209	Peak_1547	21
chr12	28011246	28011253	+	TGACTCA	6.81e-06	Peak_1551	30
chr12	31527145	31527152	+	TGACTCA	3.27e-05	Peak_1554	0
chr12	31793529	31793536	-	TGACTCA	6.81e-06	Peak_1557	38
chr12	32489204	32489211	+	TGAGTAA	0.000159	Peak_1559	37
chr12	44095595	44095602	+	TGAGTCA	9.74e-06	Peak_1566	10
chr12	45230017	45230024	+	TGATTCA	4.15e-05	Peak_1569	16
chr12	45622913	45622920	+	TGACTCA	4.15e-05	Peak_1572	9
chr12	45694727	45694734	+	TGACTCA	6.81e-06	Peak_1573	7
chr12	46500798	46500805	+	TGAGTCA	0.000115	Peak_1575	27
chr12	48169950	48169957	+	TGATTCA	3.27e-05	Peak_1578	9
chr12	49468797	49468804	-	TGACTCA	2.12e-05	Peak_1584	2
chr12	52101742	52101749	-	TGACTAA	9.56e-05	Peak_1588	38
chr12	60438887	60438894	+	TGAGTCA	2.65e-05	Peak_1597	0
chr12	61373188	61373195	+	TGATTCA	4.94e-05	Peak_1598	37
chr12	61382803	61382810	-	TGACTCA	4.15e-05	Peak_1599	25
chr12	64329351	64329358	+	TGATTCA	0.000131	Peak_1606	9
chr12	64337053	64337060	-	TGACTCA	9.74e-06	Peak_1607	10
chr12	64572244	64572251	+	TGATTCA	9.56e-05	Peak_1608	36
chr12	67245682	67245689	-	TGAGTCA	2.65e-05	Peak_1612	27
chr12	67739697	67739704	+	TGAGTCA	9.74e-06	Peak_1613	27
chr12	69223635	69223642	-	TGACTCA	5.11e-06	Peak_1615	10
chr12	70390517	70390524	+	TGAGTCA	7.71e-05	Peak_1617	1
chr12	70520709	70520716	+	TGACTCA	3.65e-06	Peak_1618	20
chr12	73570406	73570413	+	TGAGTCA	4.15e-05	Peak_1622	37
chr12	74624713	74624720	+	TGACTCA	3.65e-06	Peak_1624	21
chr12	74658098	74658105	+	TGACTCA	1.54e-05	Peak_1625	7
chr12	75373782	75373789	-	TGATTCA	3.27e-05	Peak_1628	32
chr12	77321247	77321254	+	TGACTCA	8.18e-07	Peak_1629	29
chr12	78342227	78342234	-	TGATTCA	0.000131	Peak_1630	35
chr12	78370039	78370046	-	TGACTCA	9.74e-06	Peak_1631	2
chr12	79498345	79498352	-	TGACTAA	0.000143	Peak_1634	5
chr12	90998586	90998593	-	TGACTCA	9.74e-06	Peak_1643	29
chr12	94724070	94724077	+	TGACTAA	9.56e-05	Peak_1646	15
chr12	95116103	95116110	+	TGACTCA	3.65e-06	Peak_1647	31
chr12	95363769	95363776	-	TGATTCA	6.59e-05	Peak_1649	0
chr12	100775133	100775140	-	TGACTCA	5.8e-05	Peak_1654	27
chr12	101457943	101457950	+	TGAGTAA	0.000159	Peak_1655	35
chr12	101485304	101485311	+	TGATTCA	0.000105	Peak_1656	36
chr12	102478667	102478674	-	TGAGTCA	2.12e-05	Peak_1657	19
chr12	114078401	114078408	-	TGACTCA	3.65e-06	Peak_1665	0
chr12	121451143	121451150	-	TGAGTCA	1.78e-05	Peak_1676	14
chr12	122569719	122569726	+	TGACTAA	7.71e-05	Peak_1681	15
chr13	48364660	48364667	-	TGAGTCA	2.65e-05	Peak_1692	1
chr13	56333709	56333716	-	TGACTCA	4.94e-05	Peak_1695	17
chr14	22153282	22153289	+	TGACTCA	4.94e-05	Peak_1705	7
chr14	31466500	31466507	+	TGAGTCA	1.78e-05	Peak_1707	0
chr14	49537460	49537467	-	TGACTAA	0.000171	Peak_1713	29
chr14	58814805	58814812	+	TGACTAA	0.000209	Peak_1716	24
chr14	79961968	79961975	-	TGACTAA	4.94e-05	Peak_1724	7
chr14	80174994	80175001	+	TGACTCA	5.11e-06	Peak_1725	41
chr15	42237294	42237301	+	TGACTCA	4.94e-05	Peak_1737	0
chr15	48216950	48216957	-	TGAGTCA	4.94e-05	Peak_1738	26
chr15	53987407	53987414	-	TGATTCA	0.000171	Peak_1741	38
chr15	65229931	65229938	+	TGATTCA	4.15e-05	Peak_1744	13
chr15	69787113	69787120	-	TGATTCA	7.71e-05	Peak_1747	37
chr16	44962050	44962057	+	TGATTCA	0.000171	Peak_1761	0
chr16	65903255	65903262	-	TGACTCA	3.27e-05	Peak_1771	0
chr16	68995860	68995867	-	TGATTAA	0.000221	Peak_1774	26
chr16	70883083	70883090	-	TGATTCA	4.94e-05	Peak_1776	18
chr16	71066175	71066182	+	TGACTCA	9.74e-06	Peak_1777	29
chr16	73897087	73897094	-	TGACTCA	1.64e-06	Peak_1780	21
chr16	75805383	75805390	+	TGATTCA	0.000105	Peak_1781	13
chr16	79718136	79718143	-	TGACTCA	0.000115	Peak_1783	29
chr16	83442434	83442441	-	TGAGTCA	9.56e-05	Peak_1785	26
chr16	88589794	88589801	+	TGACTCA	3.65e-06	Peak_1787	29
chr17	544456	544463	-	TGATTCA	2.65e-05	Peak_1788	13
chr17	15803372	15803379	-	TGACTCA	3.65e-06	Peak_1800	5
chr17	19802139	19802146	+	TGAGTCA	1.54e-05	Peak_1803	0
chr17	25016518	25016525	-	TGATTCA	2.65e-05	Peak_1807	13
chr17	26600370	26600377	-	TGACTCA	4.94e-05	Peak_1810	1
chr17	33642819	33642826	-	TGATTCA	4.15e-05	Peak_1813	0
chr17	40253618	40253625	+	TGACTCA	9.74e-06	Peak_1824	3
chr17	43969492	43969499	-	TGAGTCA	7.71e-05	Peak_1828	26
chr17	46365990	46365997	+	TGAGTAA	9.56e-05	Peak_1829	29
chr17	52348457	52348464	+	TGAGTCA	0.000105	Peak_1831	8
chr17	55261455	55261462	+	TGAGTCA	4.15e-05	Peak_1837	0
chr17	58251094	58251101	+	TGAGTCA	0.000115	Peak_1844	9
chr17	62378774	62378781	-	TGACTCA	1.11e-05	Peak_1852	20
chr17	65913648	65913655	+	TGACTCA	7.71e-05	Peak_1855	37
chr18	3585610	3585617	+	TGAGTCA	1.54e-05	Peak_1873	42
chr18	3593587	3593594	-	TGACTCA	5.11e-06	Peak_1874	14
chr18	6614923	6614930	-	TGAGTAA	0.000131	Peak_1877	3
chr18	6731516	6731523	-	TGACTCA	5.11e-06	Peak_1879	1
chr18	7591323	7591330	-	TGACTCA	9.74e-06	Peak_1880	1
chr18	9733662	9733669	-	TGATTAA	0.000242	Peak_1886	32
chr18	11315397	11315404	+	TGACTCA	3.27e-05	Peak_1891	23
chr18	12720305	12720312	+	TGAGTCA	1.11e-05	Peak_1895	6
chr18	12731483	12731490	-	TGATTAA	0.000221	Peak_1896	2
chr18	24999431	24999438	-	TGATTCA	0.000143	Peak_1908	9
chr18	32143767	32143774	+	TGATTCA	3.27e-05	Peak_1909	9
chr18	40437039	40437046	-	TGACTCA	2.65e-05	Peak_1913	5
chr18	44833503	44833510	+	TGAGTCA	6.59e-05	Peak_1919	27
chr18	49929592	49929599	+	TGACTAA	4.94e-05	Peak_1921	4
chr18	50594587	50594594	-	TGAATCA	0.000341	Peak_1922	28
chr18	51652007	51652014	-	TGACTAA	0.000209	Peak_1923	41
chr18	53631731	53631738	-	TGAGTCA	1.54e-05	Peak_1925	15
chr18	54399651	54399658	-	TGAGTCA	2.65e-05	Peak_1926	21
chr18	58700104	58700111	-	TGACTCA	0.000115	Peak_1929	5
chr18	72927118	72927125	-	TGATTCA	8.54e-05	Peak_1934	30
chr19	44586094	44586101	+	TGACTCA	5.11e-06	Peak_1954	19
chr19	45844047	45844054	+	TGACTCA	7.71e-05	Peak_1955	0
chr19	46565726	46565733	-	TGATTAA	0.000184	Peak_1956	36
chr19	49783788	49783795	+	TGACTCA	9.74e-06	Peak_1962	32
chr19	50619615	50619622	-	TGACTAA	4.94e-05	Peak_1963	31
chr19	53749118	53749125	-	TGACTAA	0.000131	Peak_1964	8
chr2	9345431	9345438	-	TGACTAA	0.000159	Peak_144	25
chr2	9733136	9733143	+	TGACTAA	4.94e-05	Peak_145	18
chr2	11801752	11801759	-	TGAGTAA	9.56e-05	Peak_147	8
chr2	18344269	18344276	-	TGACTCA	5.8e-05	Peak_152	21
chr2	27758738	27758745	+	TGAGTCA	4.94e-05	Peak_158	10
chr2	28372803	28372810	+	TGATTCA	4.94e-05	Peak_160	34
chr2	36358002	36358009	+	TGAGTCA	9.74e-06	Peak_166	1
chr2	36736404	36736411	-	TGAGTCA	9.56e-05	Peak_170	8
chr2	37667170	37667177	+	TGACTCA	1.11e-05	Peak_171	39
chr2	37794125	37794132	+	TGATTCA	4.15e-05	Peak_172	37
chr2	38476870	38476877	-	TGACTCA	4.15e-05	Peak_177	32
chr2	39604489	39604496	-	TGAGTCA	1.54e-05	Peak_180	35
chr2	39712509	39712516	-	TGACTAA	0.000242	Peak_181	12
chr2	43050479	43050486	+	TGACTCA	3.27e-05	Peak_185	0
chr2	47114856	47114863	+	TGACTAA	0.000242	Peak_187	9
chr2	55131906	55131913	-	TGACTCA	1.54e-05	Peak_192	42
chr2	62658741	62658748	-	TGAGTCA	1.11e-05	Peak_194	26
chr2	67998534	67998541	-	TGACTCA	6.81e-06	Peak_198	33
chr2	74998486	74998493	-	TGACTCA	0.000184	Peak_200	31
chr2	75181115	75181122	+	TGACTAA	0.000184	Peak_201	22
chr2	85665847	85665854	-	TGACTCA	3.27e-05	Peak_208	0
chr2	100275170	100275177	-	TGAGTCA	4.15e-05	Peak_214	0
chr2	152765531	152765538	-	TGACTCA	1.64e-06	Peak_227	0
chr2	172826384	172826391	-	TGACTCA	1.54e-05	Peak_229	5
chr2	178852297	178852304	-	TGACTAA	7.71e-05	Peak_233	9
chr2	187422498	187422505	+	TGATTCA	8.54e-05	Peak_235	0
chr2	189575240	189575247	+	TGACTAA	6.59e-05	Peak_237	5
chr2	201053074	201053081	+	TGAGTCA	9.56e-05	Peak_242	39
chr2	204381169	204381176	+	TGATTCA	5.8e-05	Peak_248	1
chr2	215984028	215984035	+	TGACTCA	1.78e-05	Peak_251	35
chr2	216182284	216182291	-	TGACTCA	5.8e-05	Peak_252	40
chr2	220801769	220801776	+	TGAGTCA	9.74e-06	Peak_254	24
chr2	224122269	224122276	-	TGAGTCA	1.78e-05	Peak_256	1
chr2	225664510	225664517	-	TGATTCA	0.000105	Peak_258	2
chr20	10238231	10238238	-	TGATTCA	0.000159	Peak_1969	18
chr20	11136877	11136884	+	TGATTCA	8.54e-05	Peak_1971	42
chr20	11743108	11743115	+	TGAGTAA	0.000131	Peak_1974	20
chr20	22724719	22724726	-	TGATTCA	0.000197	Peak_1977	37
chr20	29747724	29747731	+	TGACTCA	6.81e-06	Peak_1982	6
chr20	31741715	31741722	+	TGATTCA	0.000105	Peak_1983	0
chr20	32272275	32272282	+	TGACTCA	5.11e-06	Peak_1986	7
chr20	32765071	32765078	+	TGACTCA	5.8e-05	Peak_1987	10
chr20	33612559	33612566	-	TGACTCA	3.27e-05	Peak_1989	34
chr20	33927046	33927053	+	TGACTCA	6.81e-06	Peak_1993	26
chr20	33935577	33935584	-	TGACTAA	0.000105	Peak_1994	24
chr20	42558039	42558046	-	TGACTCA	1.54e-05	Peak_2001	29
chr20	42792623	42792630	+	TGAGTAA	0.000159	Peak_2002	11
chr20	48383974	48383981	-	TGAGTCA	7.71e-05	Peak_2011	0
chr20	51943361	51943368	-	TGATTCA	0.000184	Peak_2021	31
chr20	51976714	51976721	-	TGAGTCA	0.000184	Peak_2022	38
chr21	25402090	25402097	+	TGAGTCA	1.11e-05	Peak_2040	38
chr21	25623585	25623592	-	TGATTCA	8.54e-05	Peak_2041	8
chr21	26684456	26684463	+	TGAGTAA	8.54e-05	Peak_2044	16
chr21	27943694	27943701	+	TGATTCA	0.000242	Peak_2046	21
chr21	29490723	29490730	-	TGACTCA	1.64e-06	Peak_2052	10
chr21	29594509	29594516	-	TGACTCA	3.65e-06	Peak_2054	14
chr3	8854012	8854019	+	TGACTCA	5.11e-06	Peak_269	13
chr3	8904960	8904967	+	TGACTAA	0.000159	Peak_273	27
chr3	11472647	11472654	+	TGACTAA	5.8e-05	Peak_275	21
chr3	12525029	12525036	+	TGATTCA	0.000143	Peak_276	31
chr3	15327288	15327295	+	TGACTCA	3.65e-06	Peak_278	38
chr3	15652709	15652716	-	TGACTCA	3.65e-06	Peak_279	9
chr3	15785550	15785557	-	TGAGTAA	0.000242	Peak_280	0
chr3	19905992	19905999	-	TGACTCA	1.64e-06	Peak_283	30
chr3	24162629	24162636	+	TGACTCA	3.65e-06	Peak_284	24
chr3	25598846	25598853	+	TGACTCA	2.12e-05	Peak_289	2
chr3	27550633	27550640	+	TGAGTCA	1.78e-05	Peak_291	0
chr3	69894514	69894521	-	TGACTAA	5.8e-05	Peak_297	36
chr3	87465361	87465368	-	TGACTCA	1.64e-06	Peak_303	40
chr3	95171129	95171136	-	TGACTCA	4.94e-05	Peak_305	9
chr3	100612434	100612441	+	TGAGTAA	9.56e-05	Peak_306	20
chr3	112897310	112897317	+	TGATTCA	0.000105	Peak_314	25
chr3	117207138	117207145	-	TGACTCA	3.27e-05	Peak_327	0
chr3	121174944	121174951	-	TGACTAA	0.000131	Peak_329	6
chr3	121993729	121993736	-	TGACTCA	9.74e-06	Peak_332	26
chr3	123735577	123735584	+	TGAGTCA	6.59e-05	Peak_333	2
chr3	124934139	124934146	-	TGACTCA	8.54e-05	Peak_334	23
chr3	124991547	124991554	-	TGATTCA	9.56e-05	Peak_335	19
chr3	126281349	126281356	-	TGACTAA	0.000131	Peak_339	12
chr3	129476481	129476488	+	TGACTCA	6.81e-06	Peak_342	10
chr3	135529892	135529899	-	TGACTCA	3.65e-06	Peak_347	15
chr3	138019881	138019888	-	TGATTCA	6.59e-05	Peak_349	22
chr3	139896083	139896090	+	TGAGTCA	1.11e-05	Peak_350	16
chr3	142568208	142568215	-	TGACTCA	0.000131	Peak_352	22
chr3	142623281	142623288	+	TGAGTCA	1.54e-05	Peak_353	39
chr3	145792490	145792497	+	TGACTAA	0.000143	Peak_355	9
chr3	150649091	150649098	+	TGACTAA	9.56e-05	Peak_357	4
chr3	151221207	151221214	-	TGACTCA	4.15e-05	Peak_360	5
chr3	151307524	151307531	+	TGAGTCA	9.74e-06	Peak_361	2
chr3	151549134	151549141	+	TGACTCA	9.74e-06	Peak_364	15
chr3	161129206	161129213	-	TGACTCA	0.000171	Peak_374	8
chr3	162364009	162364016	-	TGAGTCA	4.15e-05	Peak_376	38
chr3	189486817	189486824	+	TGACTCA	2.12e-05	Peak_391	27
chr3	189495746	189495753	+	TGACTCA	2.12e-05	Peak_392	0
chr3	195291897	195291904	-	TGACTCA	3.65e-06	Peak_395	24
chr3	198427642	198427649	+	TGAGTCA	9.74e-06	Peak_396	32
chr4	4007324	4007331	-	TGAGTCA	1.54e-05	Peak_400	28
chr4	5090774	5090781	-	TGATTCA	4.15e-05	Peak_402	11
chr4	6741764	6741771	-	TGACTCA	5.11e-06	Peak_403	8
chr4	7897442	7897449	+	TGATTCA	0.000197	Peak_404	0
chr4	13531868	13531875	-	TGACTCA	6.81e-06	Peak_407	30
chr4	19593461	19593468	+	TGACTCA	6.81e-06	Peak_410	0
chr4	19814417	19814424	+	TGAGTAA	0.000209	Peak_411	30
chr4	35684400	35684407	-	TGAGTCA	0.000131	Peak_415	41
chr4	38516021	38516028	-	TGATTCA	8.54e-05	Peak_417	35
chr4	39534117	39534124	+	TGACTCA	3.65e-06	Peak_420	30
chr4	39799689	39799696	-	TGAGTCA	2.12e-05	Peak_421	16
chr4	39933863	39933870	+	TGACTCA	6.81e-06	Peak_422	18
chr4	40687511	40687518	+	TGATTCA	3.27e-05	Peak_423	16
chr4	41222063	41222070	-	TGAGTCA	1.11e-05	Peak_432	19
chr4	54643352	54643359	-	TGAGTCA	0.000184	Peak_440	20
chr4	57027537	57027544	-	TGATTCA	8.54e-05	Peak_443	40
chr4	73852696	73852703	+	TGACTCA	9.74e-06	Peak_447	22
chr4	74789242	74789249	+	TGAGTCA	8.54e-05	Peak_448	10
chr4	75368890	75368897	+	TGATTCA	0.000159	Peak_449	10
chr4	77922289	77922296	-	TGAGTCA	0.000184	Peak_451	14
chr4	84693276	84693283	+	TGACTAA	4.94e-05	Peak_459	26
chr4	152556689	152556696	-	TGACTAA	0.000159	Peak_475	42
chr4	174410245	174410252	-	TGAGTCA	1.78e-05	Peak_482	20
chr4	178042285	178042292	+	TGATTCA	0.000171	Peak_484	38
chr4	185541774	185541781	-	TGACTCA	4.94e-05	Peak_487	32
chr4	186997447	186997454	+	TGAGTAA	0.000115	Peak_488	27
chr4	187780255	187780262	-	TGACTCA	2.12e-05	Peak_489	30
chr4	187844133	187844140	-	TGAGTCA	1.54e-05	Peak_491	42
chr5	1843103	1843110	+	TGATTCA	0.000221	Peak_493	19
chr5	8882515	8882522	-	TGACTCA	4.94e-05	Peak_495	2
chr5	9201535	9201542	-	TGAGTAA	0.000171	Peak_496	20
chr5	9203231	9203238	-	TGACTCA	4.15e-05	Peak_497	17
chr5	9610957	9610964	+	TGACTAA	7.71e-05	Peak_499	18
chr5	13644936	13644943	-	TGATTCA	4.15e-05	Peak_512	8
chr5	14321485	14321492	+	TGACTCA	1.54e-05	Peak_518	23
chr5	14459782	14459789	-	TGACTCA	1.78e-05	Peak_519	12
chr5	17291865	17291872	-	TGAGTCA	3.27e-05	Peak_521	26
chr5	21188592	21188599	-	TGAGTCA	2.12e-05	Peak_526	35
chr5	21747876	21747883	+	TGATTCA	5.8e-05	Peak_527	20
chr5	28444236	28444243	-	TGAGTCA	0.000197	Peak_531	0
chr5	33308313	33308320	-	TGACTAA	0.000143	Peak_534	4
chr5	33357144	33357151	-	TGATTCA	0.000159	Peak_535	28
chr5	33970134	33970141	-	TGACTAA	0.000143	Peak_539	23
chr5	34644919	34644926	-	TGACTCA	4.15e-05	Peak_540	11
chr5	35082790	35082797	-	TGAGTAA	0.000197	Peak_541	34
chr5	35920149	35920156	+	TGACTCA	1.54e-05	Peak_544	39
chr5	38500168	38500175	+	TGATTCA	9.56e-05	Peak_550	24
chr5	38908276	38908283	+	TGAGTAA	0.000229	Peak_552	37
chr5	39435577	39435584	-	TGACTCA	6.81e-06	Peak_555	7
chr5	39553904	39553911	+	TGAGTAA	0.000197	Peak_556	12
chr5	42986588	42986595	+	TGACTAA	5.8e-05	Peak_561	13
chr5	43318145	43318152	-	TGATTCA	2.65e-05	Peak_567	39
chr5	50827454	50827461	+	TGACTCA	0.000131	Peak_569	17
chr5	52363587	52363594	+	TGACTCA	5.8e-05	Peak_571	21
chr5	52692595	52692602	-	TGACTCA	8.18e-07	Peak_574	35
chr5	54076132	54076139	+	TGAGTCA	1.11e-05	Peak_580	38
chr5	54167453	54167460	+	TGACTCA	4.15e-05	Peak_581	27
chr5	54322559	54322566	+	TGACTAA	0.000143	Peak_582	6
chr5	55358583	55358590	+	TGATTCA	0.000171	Peak_583	6
chr5	55455645	55455652	+	TGATTAA	0.000159	Peak_585	35
chr5	59118270	59118277	+	TGACTCA	6.81e-06	Peak_594	3
chr5	59124767	59124774	+	TGACTCA	3.65e-06	Peak_595	33
chr5	59172080	59172087	+	TGAATCA	0.000316	Peak_596	42
chr5	60633533	60633540	-	TGAGTAA	0.000265	Peak_599	0
chr5	61414312	61414319	-	TGACTCA	8.18e-07	Peak_601	24
chr5	64522189	64522196	+	TGATTCA	4.94e-05	Peak_604	6
chr5	64541084	64541091	+	TGACTCA	7.71e-05	Peak_607	41
chr5	72362810	72362817	-	TGACTCA	1.78e-05	Peak_617	31
chr5	72697066	72697073	-	TGAGTCA	2.65e-05	Peak_618	32
chr5	73366508	73366515	+	TGAGTCA	9.74e-06	Peak_620	0
chr5	73658773	73658780	-	TGACTCA	1.64e-06	Peak_622	5
chr5	74286751	74286758	+	TGACTCA	4.15e-05	Peak_625	35
chr5	74427161	74427168	-	TGATTCA	0.000105	Peak_627	12
chr5	74898643	74898650	+	TGAGTCA	2.65e-05	Peak_628	13
chr5	76137968	76137975	+	TGAGTAA	0.000221	Peak_629	0
chr5	77211722	77211729	-	TGAGTCA	2.12e-05	Peak_630	0
chr5	77918055	77918062	-	TGACTCA	1.54e-05	Peak_635	29
chr5	79306669	79306676	+	TGACTCA	3.27e-05	Peak_637	15
chr5	81720800	81720807	+	TGAGTCA	2.12e-05	Peak_643	0
chr5	83571221	83571228	-	TGACTAA	0.000197	Peak_645	4
chr5	83769449	83769456	+	TGACTCA	3.65e-06	Peak_648	1
chr5	86445667	86445674	-	TGATTCA	0.000105	Peak_650	28
chr5	92551448	92551455	+	TGACTAA	0.000143	Peak_657	8
chr5	92553748	92553755	-	TGAGTCA	1.11e-05	Peak_658	17
chr5	94807633	94807640	+	TGAGTAA	0.000209	Peak_662	4
chr5	97199920	97199927	+	TGACTCA	6.81e-06	Peak_678	11
chr5	97347685	97347692	+	TGACTAA	0.000251	Peak_679	10
chr5	97778849	97778856	-	TGATTAA	0.000221	Peak_682	12
chr5	97818697	97818704	-	TGATTCA	8.54e-05	Peak_683	8
chr5	97831990	97831997	+	TGATTCA	4.15e-05	Peak_684	13
chr5	102810704	102810711	+	TGAGTAA	0.000209	Peak_694	23
chr5	105761442	105761449	+	TGACTCA	6.81e-06	Peak_696	34
chr5	106789476	106789483	+	TGAGTCA	2.12e-05	Peak_697	36
chr5	108165568	108165575	+	TGATTCA	4.15e-05	Peak_700	24
chr5	110730960	110730967	-	TGATTAA	0.000184	Peak_704	39
chr5	110948455	110948462	-	TGACTCA	6.59e-05	Peak_705	5
chr5	112853126	112853133	+	TGACTCA	3.65e-06	Peak_707	26
chr5	119769677	119769684	+	TGACTAA	7.71e-05	Peak_710	9
chr5	122521509	122521516	-	TGACTCA	3.65e-06	Peak_714	0
chr5	125748813	125748820	+	TGATTCA	0.000115	Peak_718	1
chr5	133611205	133611212	-	TGATTCA	8.54e-05	Peak_723	30
chr5	134503649	134503656	+	TGACTCA	1.54e-05	Peak_724	40
chr5	135370449	135370456	+	TGAGTAA	0.000184	Peak_728	34
chr5	136510103	136510110	+	TGATTCA	3.27e-05	Peak_731	8
chr5	138264344	138264351	+	TGAGTCA	2.12e-05	Peak_733	8
chr5	139677874	139677881	-	TGAGTCA	2.12e-05	Peak_737	1
chr5	139990290	139990297	-	TGAATCA	0.000323	Peak_738	0
chr5	141413417	141413424	+	TGACTCA	3.27e-05	Peak_741	15
chr5	142004902	142004909	-	TGAGTAA	0.000221	Peak_744	7
chr5	142605988	142605995	+	TGAGTCA	1.11e-05	Peak_746	14
chr5	145285326	145285333	-	TGACTCA	3.65e-06	Peak_748	35
chr5	145306458	145306465	+	TGACTAA	0.000209	Peak_749	11
chr5	148494276	148494283	-	TGACTCA	9.74e-06	Peak_754	17
chr5	149676936	149676943	-	TGACTCA	1.54e-05	Peak_757	42
chr5	151230729	151230736	-	TGACTCA	3.27e-05	Peak_762	0
chr5	151256111	151256118	-	TGAGTCA	7.71e-05	Peak_763	15
chr5	152979619	152979626	+	TGACTCA	6.59e-05	Peak_764	19
chr5	152988860	152988867	-	TGAGTCA	2.12e-05	Peak_765	20
chr5	158538785	158538792	+	TGACTCA	1.54e-05	Peak_771	28
chr5	166999523	166999530	+	TGAGTAA	0.000229	Peak_782	40
chr5	167089909	167089916	+	TGAGTAA	0.000131	Peak_783	21
chr5	169145534	169145541	-	TGATTCA	0.000197	Peak_787	28
chr5	171344779	171344786	-	TGATTCA	0.000131	Peak_792	0
chr5	172694124	172694131	-	TGACTAA	0.000115	Peak_796	29
chr5	176906147	176906154	-	TGACTCA	8.18e-07	Peak_801	33
chr6	4304112	4304119	-	TGACTAA	7.71e-05	Peak_804	40
chr6	4678356	4678363	+	TGACTCA	1.64e-06	Peak_805	32
chr6	9874708	9874715	-	TGAGTCA	2.65e-05	Peak_807	24
chr6	10431333	10431340	+	TGAGTCA	2.12e-05	Peak_808	34
chr6	10867702	10867709	-	TGACTCA	6.59e-05	Peak_810	25
chr6	11722230	11722237	+	TGACTCA	1.54e-05	Peak_813	1
chr6	11793768	11793775	+	TGACTCA	6.81e-06	Peak_815	4
chr6	11879342	11879349	-	TGAGTAA	0.000265	Peak_816	23
chr6	16821283	16821290	-	TGACTCA	3.65e-06	Peak_822	31
chr6	17018516	17018523	+	TGACTAA	0.000159	Peak_824	30
chr6	17972664	17972671	+	TGAGTCA	0.000283	Peak_827	41
chr6	17974180	17974187	+	TGATTCA	0.000221	Peak_828	37
chr6	24337036	24337043	+	TGACTCA	9.74e-06	Peak_832	16
chr6	24440659	24440666	-	TGACTAA	7.71e-05	Peak_833	39
chr6	27871738	27871745	-	TGACTCA	9.74e-06	Peak_845	36
chr6	45726443	45726450	-	TGAGTCA	0.000242	Peak_860	35
chr6	45731735	45731742	-	TGAGTCA	0.000105	Peak_861	30
chr6	56686091	56686098	-	TGATTCA	5.8e-05	Peak_871	3
chr6	56822812	56822819	+	TGACTAA	0.000131	Peak_873	13
chr6	64765288	64765295	+	TGATTCA	9.56e-05	Peak_876	0
chr6	74470789	74470796	+	TGATTCA	8.54e-05	Peak_883	29
chr6	75373332	75373339	-	TGACTCA	6.81e-06	Peak_885	9
chr6	86170227	86170234	-	TGATTCA	0.000143	Peak_892	31
chr6	97877582	97877589	+	TGATTCA	6.59e-05	Peak_896	32
chr6	100855265	100855272	+	TGACTCA	1.11e-05	Peak_899	33
chr6	110937809	110937816	-	TGACTAA	6.59e-05	Peak_911	41
chr6	112632082	112632089	-	TGAGTAA	0.000197	Peak_916	2
chr6	113780592	113780599	+	TGACTAA	0.000197	Peak_919	27
chr6	117919991	117919998	+	TGACTCA	0.000105	Peak_926	3
chr6	119259303	119259310	+	TGACTCA	6.81e-06	Peak_929	34
chr6	122189441	122189448	+	TGAGTCA	9.74e-06	Peak_931	25
chr6	128932778	128932785	+	TGACTCA	2.12e-05	Peak_933	36
chr6	131522574	131522581	-	TGACTCA	4.94e-05	Peak_936	32
chr6	132697300	132697307	-	TGATTCA	8.54e-05	Peak_939	4
chr6	134900102	134900109	-	TGACTCA	2.12e-05	Peak_942	41
chr6	138651771	138651778	-	TGACTAA	6.59e-05	Peak_947	7
chr6	140406400	140406407	-	TGACTCA	5.11e-06	Peak_949	20
chr6	140434926	140434933	-	TGACTCA	4.94e-05	Peak_950	6
chr6	166051402	166051409	-	TGATTCA	0.000293	Peak_961	19
chr7	20226066	20226073	-	TGAGTCA	1.11e-05	Peak_970	13
chr7	33986257	33986264	-	TGAGTCA	9.74e-06	Peak_977	40
chr7	33993609	33993616	+	TGACTCA	1.64e-06	Peak_978	0
chr7	75554782	75554789	-	TGATTCA	4.15e-05	Peak_985	18
chr7	81152345	81152352	+	TGACTCA	3.27e-05	Peak_993	0
chr7	83879658	83879665	-	TGACTAA	6.59e-05	Peak_995	17
chr7	100161481	100161488	+	TGAGTCA	2.12e-05	Peak_1003	0
chr7	101821114	101821121	+	TGACTCA	3.65e-06	Peak_1005	5
chr7	105644312	105644319	+	TGACTCA	4.94e-05	Peak_1009	23
chr7	106107272	106107279	-	TGATTCA	0.000197	Peak_1010	0
chr7	106203522	106203529	+	TGACTCA	2.12e-05	Peak_1012	5
chr7	115782339	115782346	-	TGACTAA	0.000131	Peak_1014	33
chr7	126865251	126865258	+	TGACTCA	4.15e-05	Peak_1015	13
chr7	130174258	130174265	+	TGACTCA	4.94e-05	Peak_1019	34
chr7	130189096	130189103	+	TGAGTCA	1.54e-05	Peak_1020	20
chr7	130222674	130222681	-	TGAGTAA	0.000159	Peak_1022	30
chr7	130295864	130295871	-	TGACTAA	4.94e-05	Peak_1024	0
chr7	138211433	138211440	+	TGACTCA	3.27e-05	Peak_1028	34
chr7	140708996	140709003	+	TGACTAA	0.000159	Peak_1030	8
chr7	141370946	141370953	-	TGAATCA	0.000341	Peak_1032	18
chr7	148561691	148561698	-	TGACTCA	5.8e-05	Peak_1036	36
chr8	28522666	28522673	+	TGACTCA	1.78e-05	Peak_1050	14
chr8	29163565	29163572	+	TGACTCA	3.27e-05	Peak_1051	28
chr8	29578727	29578734	+	TGAGTCA	2.12e-05	Peak_1052	36
chr8	29665806	29665813	-	TGAGTCA	0.000242	Peak_1054	7
chr8	30781471	30781478	+	TGACTCA	4.15e-05	Peak_1056	42
chr8	32300654	32300661	-	TGACTCA	6.59e-05	Peak_1058	33
chr8	35464213	35464220	-	TGACTCA	6.81e-06	Peak_1062	6
chr8	38976633	38976640	-	TGACTCA	0.000131	Peak_1064	3
chr8	39014991	39014998	-	TGAGTCA	2.12e-05	Peak_1065	1
chr8	41097285	41097292	+	TGACTCA	6.81e-06	Peak_1066	27
chr8	67048775	67048782	-	TGATTCA	6.59e-05	Peak_1077	0
chr8	67546251	67546258	+	TGACTCA	4.15e-05	Peak_1078	37
chr8	67610687	67610694	-	TGACTCA	0.000184	Peak_1081	25
chr8	74635981	74635988	+	TGACTCA	1.54e-05	Peak_1085	17
chr8	77480956	77480963	-	TGACTCA	5.11e-06	Peak_1086	15
chr8	77506231	77506238	+	TGAGTAA	9.56e-05	Peak_1088	30
chr8	77873350	77873357	+	TGATTCA	4.15e-05	Peak_1089	2
chr8	78030128	78030135	-	TGAGTCA	7.71e-05	Peak_1090	7
chr8	82125572	82125579	+	TGAGTCA	0.000105	Peak_1096	3
chr8	83332872	83332879	-	TGACTCA	4.94e-05	Peak_1100	6
chr8	83643749	83643756	+	TGACTAA	5.8e-05	Peak_1101	33
chr8	87386871	87386878	+	TGACTCA	3.65e-06	Peak_1103	15
chr8	88815263	88815270	+	TGATTCA	2.65e-05	Peak_1104	6
chr8	97987488	97987495	-	TGACTCA	1.64e-06	Peak_1110	13
chr8	119059778	119059785	+	TGAGTAA	0.000229	Peak_1115	20
chr8	119092990	119092997	+	TGACTAA	0.000143	Peak_1117	1
chr8	123771228	123771235	-	TGACTAA	0.000184	Peak_1125	26
chr8	128913184	128913191	-	TGACTCA	5.11e-06	Peak_1130	2
chr8	129051001	129051008	+	TGAGTCA	2.12e-05	Peak_1131	36
chr8	129747593	129747600	+	TGACTCA	6.81e-06	Peak_1137	3
chr8	131149395	131149402	-	TGAGTCA	2.12e-05	Peak_1139	0
chr8	142106216	142106223	+	TGAGTAA	0.000171	Peak_1143	13
chr9	22228092	22228099	-	TGACTCA	6.81e-06	Peak_1152	2
chr9	26255530	26255537	+	TGAGTAA	7.71e-05	Peak_1154	10
chr9	36019938	36019945	-	TGATTCA	5.8e-05	Peak_1159	0
chr9	36092480	36092487	+	TGACTCA	1.64e-06	Peak_1160	20
chr9	74923774	74923781	-	TGATTCA	4.15e-05	Peak_1169	0
chr9	74954414	74954421	-	TGACTCA	3.27e-05	Peak_1170	25
chr9	80671642	80671649	-	TGACTCA	1.64e-06	Peak_1173	17
chr9	82833394	82833401	-	TGAGTAA	0.000159	Peak_1180	16
chr9	83194539	83194546	+	TGACTAA	6.59e-05	Peak_1181	37
chr9	83647568	83647575	+	TGACTCA	8.18e-07	Peak_1182	25
chr9	85690434	85690441	-	TGAGTCA	1.11e-05	Peak_1183	17
chr9	85986735	85986742	+	TGATTCA	6.59e-05	Peak_1184	36
chr9	93781382	93781389	-	TGAGTCA	1.54e-05	Peak_1188	0
chr9	96670178	96670185	+	TGACTAA	9.56e-05	Peak_1194	39
chr9	98222621	98222628	-	TGATTAA	0.000197	Peak_1197	0
chr9	98660228	98660235	-	TGACTCA	9.74e-06	Peak_1198	16
chr9	100859398	100859405	+	TGACTAA	9.56e-05	Peak_1200	0
chr9	108694966	108694973	-	TGACTCA	1.54e-05	Peak_1205	29
chr9	109015817	109015824	-	TGACTCA	6.81e-06	Peak_1206	38
chr9	110814520	110814527	-	TGACTCA	2.65e-05	Peak_1209	1
chr9	111831640	111831647	+	TGACTAA	4.94e-05	Peak_1212	16
chr9	113767759	113767766	-	TGAGTAA	0.000242	Peak_1218	23
chr9	113822980	113822987	-	TGATTCA	0.000143	Peak_1219	0
chr9	114990186	114990193	-	TGAGTCA	7.71e-05	Peak_1221	5
chrX	16088937	16088944	+	TGACTAA	9.56e-05	Peak_2067	12
chrX	45251431	45251438	-	TGATTCA	0.000105	Peak_2072	15
chrX	65772051	65772058	-	TGAGTCA	9.74e-06	Peak_2079	4
chrX	73241079	73241086	-	TGACTCA	8.18e-07	Peak_2080	6

## Sheet: Table S3B TEAD1
Table S3B TEAD1 motif locations (hg18) found by MEME within 50 bp of CSB-PGBD3 peak summits
Chromosome	Start	End	Strand	TEAD1 Motif	p-Value	CSB-PGBD3 Peak	Distance from peak summit
chr1	27739529	27739536	+	AGGCATG	0.00015	Peak_8	5
chr1	28637246	28637253	-	AGGAATG	4.18e-06	Peak_9	13
chr1	59381597	59381604	+	AGGAATT	2.7e-05	Peak_19	2
chr1	67925188	67925195	-	AGGAATT	2.7e-05	Peak_32	31
chr1	79070194	79070201	-	AGGAATG	4.18e-06	Peak_40	10
chr1	84604013	84604020	-	TGGAATG	9.76e-05	Peak_41	30
chr1	85765680	85765687	+	TGGAATG	2.54e-06	Peak_49	25
chr1	101369050	101369057	+	TGGAATG	2.7e-05	Peak_65	3
chr1	109541662	109541669	-	AGGAATC	0.000121	Peak_66	35
chr1	119623744	119623751	-	TGGAATG	1.64e-06	Peak_75	9
chr1	201794277	201794284	+	AGGAATG	8.39e-05	Peak_87	3
chr1	205145544	205145551	-	TGGAATG	1.28e-05	Peak_91	6
chr1	216736756	216736763	-	TGGAATT	1.87e-05	Peak_100	28
chr1	220822204	220822211	+	AGGAATT	8.39e-05	Peak_107	21
chr1	228307347	228307354	+	TGGAATG	0.00014	Peak_114	32
chr1	233165209	233165216	+	AGGAATG	0.000156	Peak_119	27
chr1	234761831	234761838	-	TGGAATT	1.28e-05	Peak_122	1
chr1	236408091	236408098	+	AGGAATG	9.03e-07	Peak_125	0
chr1	245972336	245972343	+	TGGAATG	1.28e-05	Peak_137	23
chr1	245976487	245976494	+	TGGAATG	0.000112	Peak_138	37
chr10	8371441	8371448	+	AGGAATG	2.7e-05	Peak_1244	9
chr10	14032111	14032118	+	AGGAATT	7.01e-05	Peak_1252	34
chr10	17050543	17050550	-	TGGAATG	2.7e-05	Peak_1259	27
chr10	26815559	26815566	-	TGGAATT	7.01e-05	Peak_1281	7
chr10	28406977	28406984	+	TGGCATG	0.000127	Peak_1282	19
chr10	30113494	30113501	-	AGGAATG	0.000112	Peak_1289	15
chr10	32526481	32526488	+	TGGAATG	2.7e-05	Peak_1294	13
chr10	33312436	33312443	-	TGGAATG	3.92e-05	Peak_1297	8
chr10	33592671	33592678	-	TGGAATT	5.6e-05	Peak_1299	0
chr10	44676954	44676961	+	TGGAATG	2.7e-05	Peak_1317	38
chr10	46469944	46469951	+	TGGCATG	0.000112	Peak_1319	42
chr10	63058769	63058776	+	TGGAATT	0.00014	Peak_1329	25
chr10	73601044	73601051	-	AGGAATG	3.74e-05	Peak_1334	7
chr10	75396073	75396080	-	TGGAATT	5.04e-05	Peak_1337	21
chr10	78780411	78780418	-	TGGAATT	3.74e-05	Peak_1342	24
chr10	116010974	116010981	+	TGGAATT	7.01e-05	Peak_1361	39
chr10	118638235	118638242	+	AGGAATG	1.87e-05	Peak_1362	13
chr11	28735337	28735344	+	TGGAATG	1.42e-05	Peak_1376	34
chr11	59230993	59231000	-	TGGAATG	2.91e-05	Peak_1391	22
chr11	61695446	61695453	+	TGGAATC	0.00015	Peak_1392	36
chr11	66218925	66218932	-	TGGAATG	1.42e-05	Peak_1402	18
chr11	71530012	71530019	-	AGGAATG	0.000121	Peak_1407	19
chr11	71533976	71533983	-	TGGAATG	1.87e-05	Peak_1408	22
chr11	74143769	74143776	+	AGGAATT	3.74e-05	Peak_1415	39
chr11	76991157	76991164	-	TGGAATG	1.28e-05	Peak_1419	36
chr11	85430752	85430759	-	AGGAATG	6.21e-05	Peak_1427	32
chr11	85549478	85549485	-	AGGCATG	3.09e-05	Peak_1430	39
chr11	86108712	86108719	-	AGGAATG	9.14e-05	Peak_1437	11
chr11	95528559	95528566	-	TGGAATG	9.15e-06	Peak_1455	29
chr11	102578158	102578165	-	AGGAATG	5.81e-06	Peak_1461	11
chr11	102985474	102985481	-	AGGAATG	9.03e-07	Peak_1462	16
chr11	104149045	104149052	-	AGGAATG	1.42e-05	Peak_1464	39
chr11	113671123	113671130	-	AGGAATG	9.14e-05	Peak_1475	31
chr12	10439793	10439800	+	TGGAATG	2.7e-05	Peak_1516	29
chr12	12867689	12867696	+	AGGAATT	2.7e-05	Peak_1523	13
chr12	12914815	12914822	+	TGGAATT	1.28e-05	Peak_1524	8
chr12	20014532	20014539	+	TGGAATT	1.28e-05	Peak_1537	42
chr12	24799243	24799250	-	AGGCATG	9.76e-05	Peak_1539	31
chr12	25738348	25738355	-	TGGAATT	5.04e-05	Peak_1540	0
chr12	51625754	51625761	+	TGGAATG	5.81e-06	Peak_1587	38
chr12	65733237	65733244	+	AGGAATG	1.28e-05	Peak_1610	30
chr12	68095975	68095982	-	AGGAATT	2.7e-05	Peak_1614	10
chr12	69223618	69223625	+	TGGAATG	3.74e-05	Peak_1615	0
chr12	70237256	70237263	+	AGGAATT	1.28e-05	Peak_1616	9
chr12	87983035	87983042	-	AGGAATC	0.000121	Peak_1638	12
chr12	89814123	89814130	+	AGGAATG	2.7e-05	Peak_1641	35
chr12	90998616	90998623	+	AGGAATT	1.87e-05	Peak_1643	0
chr12	97393362	97393369	+	AGGAATG	1.28e-05	Peak_1652	32
chr12	101457964	101457971	+	TGGAATG	5.81e-06	Peak_1655	14
chr12	112137405	112137412	+	TGGAATG	7.01e-05	Peak_1664	10
chr12	115304231	115304238	-	AGGAATG	3.74e-05	Peak_1667	18
chr12	115348776	115348783	-	TGGAATG	4.51e-05	Peak_1668	20
chr12	120112769	120112776	+	TGGAATG	4.18e-06	Peak_1673	12
chr12	121451154	121451161	-	AGGAATG	5.08e-06	Peak_1676	3
chr12	121997451	121997458	+	TGGCATG	4.51e-05	Peak_1679	29
chr13	37128849	37128856	+	TGGAATG	3.92e-05	Peak_1690	13
chr14	49537405	49537412	-	TGGAATC	0.000121	Peak_1713	19
chr14	58814818	58814825	+	AGGAATG	3.74e-05	Peak_1716	37
chr15	39329426	39329433	-	AGGAATG	3.74e-05	Peak_1733	3
chr15	40010145	40010152	-	AGGCATG	4.51e-05	Peak_1734	17
chr15	85631508	85631515	+	AGGCATG	0.000127	Peak_1750	1
chr16	20825542	20825549	-	AGGAATT	5.04e-05	Peak_1756	19
chr16	44964506	44964513	-	TGGAATG	8.39e-05	Peak_1762	30
chr16	54091501	54091508	-	TGGAATT	1.87e-05	Peak_1767	0
chr16	79718190	79718197	+	AGGAATG	5.6e-05	Peak_1783	18
chr16	85200360	85200367	-	AGGAATG	1.28e-05	Peak_1786	3
chr17	7594629	7594636	+	TGGAATT	7.01e-05	Peak_1794	30
chr17	15221998	15222005	+	AGGAATT	5.6e-05	Peak_1798	37
chr17	27105483	27105490	-	TGGAATG	1.42e-05	Peak_1811	7
chr17	34310805	34310812	+	TGGAATG	3.74e-05	Peak_1814	21
chr17	53381119	53381126	+	TGGAATG	1.87e-05	Peak_1833	22
chr17	58149805	58149812	+	AGGAATG	1.28e-05	Peak_1841	1
chr17	61993905	61993912	-	TGGAATG	9.03e-07	Peak_1851	15
chr18	2292747	2292754	+	AGGAATT	0.000112	Peak_1871	12
chr18	8115664	8115671	+	TGGAATG	3.92e-05	Peak_1882	7
chr18	9633718	9633725	+	TGGAATG	1.28e-05	Peak_1885	40
chr18	11110109	11110116	-	TGGAATG	2.54e-06	Peak_1889	40
chr18	11313575	11313582	-	AGGAATT	1.28e-05	Peak_1890	36
chr18	14095312	14095319	-	AGGAATG	3.09e-05	Peak_1898	13
chr18	24999462	24999469	-	TGGAATT	1.28e-05	Peak_1908	15
chr18	37181071	37181078	+	AGGAATG	3.09e-05	Peak_1912	39
chr18	41796602	41796609	+	AGGAATG	5.6e-05	Peak_1916	37
chr19	23524953	23524960	-	TGGAATG	3.74e-05	Peak_1944	9
chr19	50619681	50619688	+	TGGAATG	0.00014	Peak_1963	28
chr2	9232905	9232912	+	AGGCATT	9.76e-05	Peak_143	0
chr2	12470754	12470761	+	AGGAATT	1.87e-05	Peak_148	3
chr2	20155118	20155125	-	AGGAATT	9.15e-06	Peak_156	20
chr2	36570140	36570147	-	TGGAATT	5.6e-05	Peak_169	26
chr2	39575685	39575692	+	TGGAATG	2.7e-05	Peak_179	22
chr2	39712480	39712487	+	AGGAATG	5.6e-05	Peak_181	10
chr2	46148521	46148528	+	TGGAATG	1.87e-05	Peak_186	7
chr2	47279828	47279835	+	AGGAATT	5.04e-05	Peak_188	14
chr2	54563726	54563733	+	AGGAATG	1.42e-05	Peak_191	9
chr2	62753523	62753530	-	AGGAATG	2.54e-06	Peak_195	27
chr2	85665836	85665843	-	AGGAATG	9.03e-07	Peak_208	7
chr2	118330814	118330821	-	TGGAATG	0.000121	Peak_218	32
chr2	192155486	192155493	+	AGGAATG	3.74e-05	Peak_239	7
chr2	204356918	204356925	+	AGGAATG	1.64e-06	Peak_247	14
chr2	204381190	204381197	-	TGGAATG	0.000121	Peak_248	13
chr2	216182334	216182341	-	AGGAATG	8.39e-05	Peak_252	3
chr2	220801826	220801833	+	AGGAATG	9.14e-05	Peak_254	26
chr2	227057098	227057105	+	AGGAATT	1.87e-05	Peak_259	14
chr2	232587103	232587110	-	TGGAATG	1.42e-05	Peak_265	19
chr20	11323251	11323258	-	TGGAATG	2.54e-06	Peak_1973	1
chr21	27989154	27989161	+	TGGAATG	3.92e-05	Peak_2048	41
chr21	28721680	28721687	+	AGGAATG	9.15e-06	Peak_2049	15
chr21	38797551	38797558	-	AGGCATG	3.09e-05	Peak_2056	3
chr22	28070238	28070245	+	TGGAATT	0.000121	Peak_2057	41
chr3	25589739	25589746	-	TGGAATG	0.000112	Peak_288	0
chr3	87090519	87090526	+	TGGAATG	9.03e-07	Peak_301	4
chr3	95171082	95171089	+	AGGAATT	5.6e-05	Peak_305	31
chr3	114477817	114477824	-	TGGCATT	0.00014	Peak_323	39
chr3	121346054	121346061	-	AGGAATG	2.7e-05	Peak_330	15
chr3	137398219	137398226	+	AGGCATG	3.74e-05	Peak_348	0
chr3	147367058	147367065	-	TGGCATG	0.000112	Peak_356	1
chr3	151221193	151221200	-	AGGAATT	0.000112	Peak_360	2
chr3	151545693	151545700	+	AGGAATG	4.51e-05	Peak_363	6
chr3	151572515	151572522	+	AGGAATT	3.74e-05	Peak_365	25
chr3	152505799	152505806	-	AGGAATG	2.7e-05	Peak_366	34
chr3	153176852	153176859	-	TGGAATG	2.7e-05	Peak_368	5
chr3	172485004	172485011	-	TGGAATG	3.74e-05	Peak_381	5
chr4	4608737	4608744	-	TGGAATG	5.6e-05	Peak_401	11
chr4	5090790	5090797	-	AGGAATT	2.7e-05	Peak_402	0
chr4	13518186	13518193	+	AGGAATG	0.000112	Peak_406	15
chr4	18493511	18493518	+	TGGAATG	1.28e-05	Peak_409	2
chr4	33859536	33859543	+	TGGCATG	0.000127	Peak_413	3
chr4	38345314	38345321	-	TGGAATG	8.39e-05	Peak_416	18
chr4	38534916	38534923	+	TGGAATT	0.000121	Peak_418	25
chr4	39933851	39933858	+	AGGAATG	9.15e-06	Peak_422	30
chr4	40840250	40840257	+	AGGAATG	4.18e-06	Peak_424	31
chr4	47824914	47824921	+	TGGCATT	0.000112	Peak_435	20
chr4	54643313	54643320	+	TGGCATG	9.76e-05	Peak_440	12
chr4	55059687	55059694	+	TGGAATG	9.03e-07	Peak_441	15
chr4	84348015	84348022	-	TGGAATG	6.21e-05	Peak_457	12
chr4	86018509	86018516	+	TGGAATG	1.42e-05	Peak_460	7
chr4	129463851	129463858	-	TGGAATG	8.39e-05	Peak_470	20
chr4	159313012	159313019	+	AGGCATG	0.000112	Peak_479	0
chr4	177428938	177428945	+	TGGCATG	0.00014	Peak_483	7
chr5	8882548	8882555	-	AGGAATG	4.51e-05	Peak_495	35
chr5	9610893	9610900	+	TGGAATT	0.000112	Peak_499	39
chr5	10567063	10567070	+	TGGAATG	9.15e-06	Peak_503	9
chr5	12296249	12296256	-	AGGAATG	1.64e-06	Peak_507	17
chr5	14159071	14159078	+	AGGAATT	9.76e-05	Peak_514	39
chr5	17291925	17291932	+	TGGAATG	2.7e-05	Peak_521	27
chr5	17302562	17302569	+	AGGAATT	8.39e-05	Peak_522	31
chr5	27277965	27277972	+	AGGAATG	6.21e-05	Peak_529	34
chr5	27351460	27351467	+	TGGAATT	9.15e-06	Peak_530	22
chr5	33863957	33863964	+	TGGAATG	7.01e-05	Peak_537	11
chr5	38890009	38890016	+	AGGCATG	0.00015	Peak_551	12
chr5	39232626	39232633	+	TGGAATG	0.000121	Peak_554	37
chr5	40588257	40588264	-	AGGAATG	5.81e-06	Peak_558	19
chr5	52359785	52359792	-	AGGCATG	6.21e-05	Peak_570	12
chr5	57030547	57030554	-	AGGAATG	9.03e-07	Peak_588	20
chr5	57520039	57520046	+	AGGAATG	3.74e-05	Peak_591	39
chr5	64530417	64530424	+	TGGAATT	7.01e-05	Peak_605	10
chr5	64535492	64535499	+	AGGAATG	0.000112	Peak_606	14
chr5	72362755	72362762	-	TGGAATG	1.28e-05	Peak_617	17
chr5	74286717	74286724	-	TGGAATG	5.6e-05	Peak_625	1
chr5	77619598	77619605	+	AGGAATT	0.00014	Peak_632	0
chr5	77812770	77812777	-	AGGAATG	3.92e-05	Peak_633	24
chr5	79306656	79306663	-	TGGAATG	1.28e-05	Peak_637	28
chr5	81087084	81087091	+	AGGAATG	2.7e-05	Peak_640	13
chr5	82899905	82899912	-	AGGCATG	4.51e-05	Peak_644	42
chr5	83767487	83767494	-	AGGAATG	4.18e-06	Peak_647	4
chr5	93579884	93579891	-	TGGAATG	2.7e-05	Peak_661	32
chr5	95073986	95073993	+	AGGAATG	2.7e-05	Peak_663	11
chr5	95122022	95122029	+	TGGCATG	0.000121	Peak_664	0
chr5	95123913	95123920	+	AGGAATG	0.000121	Peak_665	1
chr5	95616732	95616739	+	TGGAATG	2.7e-05	Peak_672	13
chr5	97347699	97347706	+	AGGAATT	5.6e-05	Peak_679	0
chr5	97831977	97831984	+	TGGAATG	1.28e-05	Peak_684	26
chr5	98127085	98127092	-	AGGAATG	2.7e-05	Peak_688	35
chr5	119751991	119751998	-	TGGCATT	9.76e-05	Peak_709	17
chr5	125880684	125880691	+	TGGAATG	0.000112	Peak_720	17
chr5	139990262	139990269	+	TGGAATT	0.000112	Peak_738	27
chr5	142603860	142603867	+	AGGAATG	9.76e-05	Peak_745	18
chr5	145285297	145285304	+	AGGAATG	1.28e-05	Peak_748	6
chr5	151089647	151089654	+	AGGAATG	1.64e-06	Peak_759	13
chr5	151230742	151230749	+	TGGAATT	5.04e-05	Peak_762	6
chr5	153727988	153727995	+	AGGAATG	4.51e-05	Peak_766	0
chr5	156744763	156744770	+	TGGCATG	3.99e-05	Peak_767	13
chr5	158061884	158061891	+	TGGAATG	2.7e-05	Peak_770	7
chr5	158544636	158544643	-	AGGAATG	3.74e-05	Peak_772	33
chr5	166999484	166999491	+	AGGAATG	9.14e-05	Peak_782	1
chr5	172228261	172228268	+	AGGAATG	6.21e-05	Peak_793	0
chr6	9590336	9590343	+	TGGAATG	4.51e-05	Peak_806	37
chr6	10867689	10867696	-	AGGAATG	5.04e-05	Peak_810	38
chr6	17697855	17697862	+	AGGAATG	8.39e-05	Peak_826	0
chr6	17972578	17972585	+	AGGCATG	4.51e-05	Peak_827	38
chr6	45726486	45726493	-	AGGAATT	2.7e-05	Peak_860	1
chr6	49617249	49617256	+	TGGAATG	8.39e-05	Peak_866	32
chr6	57240996	57241003	+	AGGAATG	2.54e-06	Peak_874	0
chr6	72171279	72171286	-	TGGAATG	9.15e-06	Peak_880	5
chr6	75373361	75373368	-	TGGAATG	1.28e-05	Peak_885	13
chr6	75949677	75949684	-	AGGAATT	5.6e-05	Peak_886	35
chr6	86170274	86170281	+	TGGAATG	9.03e-07	Peak_892	9
chr6	91662236	91662243	-	AGGAATG	2.7e-05	Peak_894	11
chr6	106151124	106151131	+	TGGAATG	2.91e-05	Peak_902	31
chr6	110956475	110956482	-	AGGAATG	8.39e-05	Peak_912	32
chr6	116875737	116875744	+	AGGAATG	4.51e-05	Peak_922	18
chr6	117876675	117876682	-	TGGAATT	9.15e-06	Peak_925	27
chr6	117919976	117919983	+	TGGAATG	9.15e-06	Peak_926	5
chr6	134914346	134914353	+	AGGAATG	9.14e-05	Peak_943	19
chr6	135272124	135272131	-	AGGAATG	1.28e-05	Peak_944	15
chr6	140071913	140071920	+	AGGAATG	9.15e-06	Peak_948	12
chr6	158381645	158381652	+	AGGAATG	1.64e-06	Peak_957	8
chr6	166051444	166051451	+	AGGAATT	0.00014	Peak_961	16
chr6	169215526	169215533	+	AGGAATG	2.7e-05	Peak_963	40
chr7	13926570	13926577	-	TGGAATG	9.03e-07	Peak_967	23
chr7	22579242	22579249	-	TGGAATG	3.74e-05	Peak_971	37
chr7	28043382	28043389	+	AGGAATT	9.14e-05	Peak_973	40
chr7	79613252	79613259	-	TGGAATG	1.28e-05	Peak_989	14
chr7	80190301	80190308	-	TGGAATG	8.39e-05	Peak_990	16
chr7	80409655	80409662	-	AGGAATG	9.15e-06	Peak_992	7
chr7	84603422	84603429	+	TGGAATG	9.15e-06	Peak_996	30
chr7	129783515	129783522	-	AGGAATG	1.28e-05	Peak_1017	19
chr7	129916330	129916337	+	TGGAATG	8.39e-05	Peak_1018	37
chr7	130968954	130968961	-	TGGAATT	5.04e-05	Peak_1026	3
chr7	140708979	140708986	+	TGGAATC	0.000156	Peak_1030	25
chr7	148561755	148561762	-	TGGAATG	6.21e-05	Peak_1036	21
chr8	11410974	11410981	-	TGGAATG	2.7e-05	Peak_1043	42
chr8	30781406	30781413	+	TGGAATT	1.28e-05	Peak_1056	16
chr8	33190988	33190995	+	TGGAATG	0.000121	Peak_1060	2
chr8	41097334	41097341	-	AGGAATG	0.000156	Peak_1066	15
chr8	67610755	67610762	+	AGGAATG	8.39e-05	Peak_1081	36
chr8	82125599	82125606	-	AGGAATG	6.21e-05	Peak_1096	30
chr8	82853859	82853866	+	TGGAATG	3.74e-05	Peak_1097	0
chr8	82901123	82901130	+	TGGAATG	2.7e-05	Peak_1098	30
chr8	124601779	124601786	+	TGGAATT	9.15e-06	Peak_1126	34
chr8	129050982	129050989	-	AGGAATG	3.74e-05	Peak_1131	17
chr8	129209384	129209391	-	AGGAATG	4.18e-06	Peak_1132	21
chr8	129396211	129396218	+	TGGAATG	9.15e-06	Peak_1134	16
chr8	129402903	129402910	+	TGGAATG	2.7e-05	Peak_1135	8
chr9	21581718	21581725	+	TGGAATT	6.21e-05	Peak_1149	12
chr9	22087779	22087786	-	AGGAATG	9.14e-05	Peak_1150	29
chr9	22093443	22093450	-	AGGAATG	4.51e-05	Peak_1151	9
chr9	22228120	22228127	-	AGGAATT	7.01e-05	Peak_1152	19
chr9	36092465	36092472	+	AGGAATT	1.87e-05	Peak_1160	35
chr9	83194504	83194511	+	TGGAATT	5.04e-05	Peak_1181	2
chr9	85690413	85690420	+	TGGAATG	1.42e-05	Peak_1183	0
chr9	85986718	85986725	+	TGGCATT	9.76e-05	Peak_1184	19
chr9	90075952	90075959	-	AGGAATG	2.7e-05	Peak_1186	11
chr9	96670189	96670196	-	TGGAATT	5.04e-05	Peak_1194	28
chr9	97185672	97185679	-	TGGAATG	2.7e-05	Peak_1196	14
chr9	99516697	99516704	+	AGGAATG	4.51e-05	Peak_1199	9
chr9	109077123	109077130	-	TGGAATG	8.39e-05	Peak_1207	18
chr9	111831623	111831630	-	TGGAATG	4.51e-05	Peak_1212	0
chr9	113767814	113767821	+	AGGAATC	0.000186	Peak_1218	25
chrX	45251405	45251412	-	AGGAATG	1.64e-06	Peak_2072	41

## Sheet: Table S3C CTCF
Table S3C CTCF motif locations (hg18) found by MEME within 50 bp of CSB-PGBD3 peak summits
Chromosome	Start	End	Strand	CTCF Motif	p-Value	CSB-PGBD3 Peak	Distance from peak summit
chr1	71319572	71319583	-	CCTGTAGGGGGC	2.27e-06	Peak_36	4
chr1	94299750	94299761	+	CCACCAGAGGAC	9.15e-07	Peak_56	26
chr1	176580379	176580390	-	CCACTAGGGAGC	2.27e-06	Peak_85	17
chr1	233334297	233334308	+	CCGCCAGAGGGC	2.62e-06	Peak_120	6
chr10	33021240	33021251	-	CCAGCAGATGGG	4.95e-06	Peak_1296	20
chr10	33592629	33592640	-	CCTCCAGGGGGG	3.03e-06	Peak_1299	32
chr11	66218880	66218891	+	TCAGCAGAGGGC	8.84e-06	Peak_1402	16
chr11	85997247	85997258	-	CCTCTAGAGGGA	6.79e-06	Peak_1435	33
chr11	86810225	86810236	-	CCACTAGGTGTC	3.6e-06	Peak_1442	7
chr11	88868894	88868905	+	CCACCAGGGAGC	9.15e-07	Peak_1445	17
chr11	111450038	111450049	-	CCAGAAGGGGGA	7.45e-06	Peak_1472	34
chr11	121579023	121579034	-	CCACAAGGGGGA	3.93e-06	Peak_1498	6
chr12	6264614	6264625	-	CCACCAGAGGGC	5.41e-08	Peak_1506	9
chr12	6715291	6715302	+	CCACTGGGTGGC	1.21e-05	Peak_1510	7
chr12	8039264	8039275	-	CCACCAGGTGGC	2.05e-07	Peak_1512	32
chr12	27696550	27696561	-	CCACAAGGGGGC	5.43e-07	Peak_1550	13
chr12	30891567	30891578	+	CCTCTAGGGGGA	5.8e-06	Peak_1553	0
chr12	31726505	31726516	+	CCACAAGGTGGC	1.91e-06	Peak_1556	16
chr12	51625739	51625750	-	CCAGCAGAAGGG	1.9e-05	Peak_1587	23
chr12	52101803	52101814	-	CCACCAGAGGTC	6.98e-07	Peak_1588	16
chr12	68095950	68095961	+	CCTGAAGGTGGC	1.39e-05	Peak_1614	4
chr12	74014539	74014550	+	CCACCAGAGGGC	5.41e-08	Peak_1623	7
chr16	76191401	76191412	+	CCACTAGATGGA	4.45e-06	Peak_1782	17
chr17	69711288	69711299	+	CCACAAGGGGGC	5.43e-07	Peak_1859	13
chr18	54399691	54399702	+	CCAGCAGGGGAG	9.41e-06	Peak_1926	12
chr19	47521297	47521308	-	CCACTGGAGGGC	6.09e-06	Peak_1958	20
chr19	49147092	49147103	-	CCTCCAGGGGGA	2.86e-06	Peak_1961	10
chr2	135257008	135257019	+	CCACTAGGGGAC	1.85e-06	Peak_222	23
chr20	11136828	11136839	+	CCACTAGAGGAA	1.04e-05	Peak_1971	0
chr20	25238060	25238071	-	CCAGCAGGAGGC	3.6e-06	Peak_1979	26
chr20	60770484	60770495	+	CCACTAGAGGGG	1.85e-06	Peak_2032	35
chr21	19246029	19246040	+	CCAGTAGAGGGC	3.32e-07	Peak_2039	26
chr3	113855283	113855294	-	CCTCCAGAGAGC	5.8e-06	Peak_321	28
chr4	4007383	4007394	-	CCAGCAGAGGAG	1.13e-05	Peak_400	24
chr4	163979637	163979648	-	CCAGTAGATGTC	7.86e-06	Peak_480	16
chr5	90716576	90716587	-	CCACCAGGTGTC	1.85e-06	Peak_654	20
chr5	96895740	96895751	-	CCACCAGAGGTC	6.98e-07	Peak_677	36
chr5	112853173	112853184	-	CCACCAGAGAAC	8.84e-06	Peak_707	14
chr5	119822049	119822060	-	CCACTAGAGGGC	1.75e-07	Peak_712	33
chr5	141908747	141908758	-	CCAGGAGGGGGC	3.6e-06	Peak_743	36
chr5	148272624	148272635	+	CCTGCAGATGGC	3.6e-06	Peak_751	10
chr5	162862885	162862896	-	CCTGCAGAGAGC	1.04e-05	Peak_776	30
chr5	172653722	172653733	+	CCGCCAGGTGGC	5.8e-06	Peak_795	15
chr5	172873404	172873415	-	CCACTAGAGGAG	1.13e-05	Peak_799	25
chr6	3923604	3923615	-	CCACTAGATGTC	4.45e-06	Peak_803	0
chr6	30688198	30688209	-	CCAGCAGAGGGC	1.75e-07	Peak_852	10
chr6	57241018	57241029	+	CCACCAGGTGGT	1.33e-05	Peak_874	19
chr6	74570408	74570419	+	TCAGCAGGGGGC	7.45e-06	Peak_884	36
chr6	91662203	91662214	+	CCACCAGAGAGC	1.19e-06	Peak_894	11
chr6	105958182	105958193	-	CCACCAGGGGTC	4.88e-07	Peak_900	0
chr6	130384055	130384066	-	CCACTAGAGGTC	1.51e-06	Peak_934	0
chr7	129376280	129376291	+	CCACCAGGGAGA	5.8e-06	Peak_1016	24
chr8	27510757	27510768	-	CCAGCAGGTGGC	4.88e-07	Peak_1049	20
chr8	38361820	38361831	-	CCACTAGAGGTC	1.51e-06	Peak_1063	17
chr8	66909531	66909542	+	CCAGCAGGTGGA	3.6e-06	Peak_1076	11
chr9	79840327	79840338	-	CCTGTAGGTGGC	5.8e-06	Peak_1172	25
chr9	111620161	111620172	-	CCACTAGGAGGC	3.6e-06	Peak_1210	0
chrX	10047588	10047599	-	CCACGAGATGGC	5.8e-06	Peak_2064	14
