# Supplementary material for: Tethering of the Conserved piggyBac Transposase Fusion Protein CSB-PGBD3 to Chromosomal AP-1 Proteins Regulates Expression of Nearby Genes in Humans
Source: PLoS Genet. 2012 Sep 27;8(9):e1002972. doi: 10.1371/journal.pgen.1002972 (PMC3459987; doi:10.1371/journal.pgen.1002972)
Supplement: Table S4 — Summary of GREAT comparisons between CSB-PGBD3 binding sites and genes that exhibit expression changes of 2-fold or more when CSB, CSB-PGBD3, or both were stably expressed in CSB-null UVSS1KO cells, or when wild type CSB was stably expressed in the compound heterozygous CS1AN cell line which continues to express the CSB-PGBD3 fusion protein. The number of peaks in each set are given by numbers in parentheses. Bold p-values indicate a false discovery rate of less than 1%. (XLS) [file pgen.1002972.s009.xls]

## Sheet: Table S4
Table S4 Comparisons between CSB-PGBD3 binding sites and genes up and down regulated by CSB, CSB-PGBD3, or both in UVSS1KO and by CSB rescue of CS1AN
1 Mb Regulatory Domains		All Peaks (2087)	MER85 peaks (331)	TRE Peaks (585)	TEAD Peaks (269)	CTCF Peaks(58)	RNAPII Peaks (105)	Other peaks (803)
Cell Line	2-fold direction	p-value	p-value	p-value	p-value	p-value	p-value	p-value
UVSS1KO + CSB	Down	8.24521e-05	0.864415	0.00363392	0.0933444	0.00141711	0.016203	0.0172597
UVSS1KO + CSB	Up	0.0612681	0.221566	0.0454151	0.0445633	0.0925455	0.470667	0.701811
UVSS1KO + CSB-PGBD3	Down	1.89972e-11	0.103329	0.000139284	0.00219718	0.115681	0.0987855	1.06859e-06
UVSS1KO + CSB-PGBD3	Up	1.26899e-08	0.161544	1.37497e-05	0.085338	0.00646022	0.0638031	0.00043326
UVSS1KO + CSB + CSB-PGBD3	Down	1.41149e-06	0.291361	0.000409989	0.587198	0.0325194	0.0218243	0.000516393
UVSS1KO + CSB + CSB-PGBD3	Up	4.84011e-15	0.0705515	5.80531e-06	0.000430185	0.00881137	8.69555e-06	6.3591e-06
CS1AN CSB Rescue	Down	2.81898e-20	0.334135	2.73069e-09	5.31537e-06	0.00197388	0.00318494	8.64295e-10
CS1AN CSB Rescue	Up	0.0469	0.538103	0.0558302	0.0983707	0.134617	0.0124659	0.537569
250kb Regulatory Domains		All Peaks (2087)	MER85 peaks (331)	TRE Peaks (585)	TEAD Peaks (269)	CTCF Peaks(58)	RNAPII Peaks (105)	Other peaks (803)
Cell Line	2-fold direction	p-value	p-value	p-value	p-value	p-value	p-value	p-value
UVSS1KO + CSB	Down	0.0366971	0.850537	0.0790714	0.373835	0.154965	0.12897	0.105879
UVSS1KO + CSB	Up	0.425885	0.258759	0.366303	0.349272	0.350727	1	0.729108
UVSS1KO + CSB-PGBD3	Down	2.89608e-11	0.0301985	3.46637e-05	0.000359906	0.110114	0.128736	3.90153e-05
UVSS1KO + CSB-PGBD3	Up	1.72861e-05	0.232804	3.90764e-05	0.00611193	0.0157456	0.0407832	0.194706
UVSS1KO + CSB + CSB-PGBD3	Down	0.135144	0.883656	0.11962	0.31506	0.0128768	0.504947	0.339256
UVSS1KO + CSB + CSB-PGBD3	Up	4.95703e-13	0.0182704	0.000239396	0.0013976	0.0155517	9.48134e-07	0.00032368
CS1AN CSB Rescue	Down	1.20137e-25	0.116389	1.68588e-07	1.9329e-07	0.00467849	0.00979376	3.26596e-12
CS1AN CSB Rescue	Up	0.23247	0.60544	0.0518468	0.176401	0.325047	0.000623879	0.928616
100kb Regulatory Domains		All Peaks (2087)	MER85 peaks (331)	TRE Peaks (585)	TEAD Peaks (269)	CTCF Peaks(58)	RNAPII Peaks (105)	Other peaks (803)
Cell Line	2-fold direction	p-value	p-value	p-value	p-value	p-value	p-value	p-value
UVSS1KO + CSB	Down	0.559427	0.650122	0.657151	0.914265	0.0115215	0.52855	0.552614
UVSS1KO + CSB	Up	0.65021	0.400948	0.405909	0.211593	1	1	0.920878
UVSS1KO + CSB-PGBD3	Down	1.3161e-05	0.0722185	0.00621245	0.070636	0.0543149	0.324366	0.0173892
UVSS1KO + CSB-PGBD3	Up	0.00706695	0.102795	0.00279098	0.152567	0.00526908	0.393912	0.685868
UVSS1KO + CSB + CSB-PGBD3	Down	0.215784	0.686222	0.45076	0.213561	0.0764788	0.962326	0.300635
UVSS1KO + CSB + CSB-PGBD3	Up	7.53921e-06	0.0564671	0.0046447	0.00956899	0.286181	0.00364707	0.0997436
CS1AN CSB Rescue	Down	1.36933e-18	0.02708	1.76342e-05	1.17056e-06	0.0589317	0.00221159	1.81305e-07
CS1AN CSB Rescue	Up	0.894426	0.816324	0.373283	0.194173	1	0.62916	0.991343
