# Supplementary material for: Tethering of the Conserved piggyBac Transposase Fusion Protein CSB-PGBD3 to Chromosomal AP-1 Proteins Regulates Expression of Nearby Genes in Humans
Source: PLoS Genet. 2012 Sep 27;8(9):e1002972. doi: 10.1371/journal.pgen.1002972 (PMC3459987; doi:10.1371/journal.pgen.1002972)
Supplement: Table S5 — GREAT results for comparisons of CSB-PGBD3 binding sites to diverse sets of gene ontologies. Only the five most significant results displayed by GREAT for each category are presented. Angiogenesis and blood vessel development genes are highly enriched near binding sites containing TRE or TEAD1 motifs. AP-1 proteins are known to regulate genes related to angiogenesis [18] although a role for TEAD1 in this process has not been studied. Genes involved in the related, but distinct transforming growth factor beta (TGF-beta) and bone morphogenesis protein (BMP) receptor signaling pathways are enriched near CSB-PGBD3 binding sites. The BMP receptor pathway is significantly enriched near the set of all CSB-PGBD3 peaks and the set with no identified motif, whereas TGF-beta receptor signaling is enriched near bound TRE motifs. SMAD2/3 signaling and the ALK1 pathway are also enriched near CSB-PGBD3 peaks over TRE motifs. All four of these factors – BMPR, TGF-beta, SMAD2/3, and ALK1 – are involved in overlapping pathways that regulate cell proliferation, bone growth, angiogenesis, and cell migration [80], [81]. Disease Ontology and MSigDB perturbation terms related to breast, osteosarcoma, ovarian, cervical, melanocytic, and pancreatic cancers as well as GO Biological Processes for extracellular matrix organization and regulation of cell adhesion are enriched in one or multiple peak categories consistent with the notion that these ontologies reflect common pathways in oncogenesis. Immune response genes are enriched near CSB-PGBD3 binding sites, particularly those involved in IL-2 and IFN-gamma signaling. CSB-PGBD3 binding sites with TRE and TEAD1 motifs correlate strongly with IFN-gamma ontologies from Pathway Commons, while the set of all CSB-PGBD3 peaks and peaks with no identified motif were enriched near genes related to IL-2 signaling. GO, Gene Ontology; MSigDB, Molecular Signatures Database. *Raw binomial P-values reported by GREAT. **Hypergeometric false discovery rate ( [file pgen.1002972.s010.xls]

## Sheet: Table S5
Table S5 Comparisons of CSB-PGBD3 binding sites to diverse gene ontologies using GREAT
All Peaks (2087)				TRE Peaks (585)
GO Biological Processes	P-value*	FDR**		GO Biological Processes	P-value	FDR
positive regulation of catecholamine secretion	4.37891e-11	0.0341367		blood vessel development	3.45803e-09	3.02566e-09
positive regulation of amine transport	2.55644e-09	0.0357155		vasculature development	4.42144e-09	3.21211e-09
positive regulation of secretion	4.14029e-09	0.0257372		blood vessel morphogenesis	9.47793e-09	1.23784e-08
extracellular matrix organization	6.70618e-08	0.00328385		angiogenesis	1.20628e-07	2.57102e-05
positive regulation of cell adhesion	1.00195e-07	0.000478144		response to oxygen levels	1.65e-07	0.00208178
Disease Ontology				Disease Ontology
malignant neoplasm of ovary	5.9725e-13	0.000483019		respiratory system disease	2.37722e-09	0.000115368
cervix carcinoma	8.25671e-09	0.00309191		cervix carcinoma	9.85425e-08	9.32533e-05
Adenoviridae infectious disease	2.55291e-06	0.0447447		neurodegenerative disease	1.36865e-07	0.00480145
pulmonary fibrosis	3.36755e-06	0.0152524		melanoma	4.27887e-07	0.000103065
diabetic retinopathy	0.000288849	0.014163		melanocytic neoplasm	5.28029e-07	6.91821e-05
Pathway Commons				Pathway Commons
TNF receptor signaling pathway	4.23842e-15	6.91244e-05		IFN-gamma pathway	5.82473e-11	1.01256e-07
BMP receptor signaling	1.83642e-11	0.000167199		Regulation of cytoplasmic and nuclear SMAD2/3 signaling	1.24531e-09	7.75591e-07
Formation of Platelet plug	6.12303e-10	0.0350098		TGF-beta receptor signaling	1.24531e-09	7.75591e-07
IL2-mediated signaling events	3.00613e-09	0.00412162		Regulation of nuclear SMAD2/3 signaling	1.24531e-09	7.75591e-07
IL2 signaling events mediated by PI3K	6.00388e-09	0.0272391		ALK1 pathway	3.0103e-09	4.2191e-07
MSigDB Perturbation				MSigDB Perturbation
Genes down-regulated in luminal-like breast cancer cell lines compared to the mesenchymal-like ones.	1.93549e-33	1.83646e-25		Genes down-regulated in luminal-like breast cancer cell lines compared to the basal-like ones.	9.9239e-14	5.86432e-12
Genes down-regulated in luminal-like breast cancer cell lines compared to the basal-like ones.	8.72451e-29	5.50425e-16		Genes down-regulated in luminal-like breast cancer cell lines compared to the mesenchymal-like ones.	4.11491e-13	5.99672e-16
Genes down-regulated in UB27 cells (osteosarcoma) at 12 hr after inducing the expression of a mutated form of WT1 [Gene ID=7490].	6.47007e-23	0.000137806		Genes up-regulated in U2OS cells (osteosarcoma) upon knockdown of HDAC1 [Gene ID=3065] by RNAi.	3.62677e-12	1.70958e-06
Genes down-regulated in primary fibroblast cell culture after infection with HCMV (AD169 strain) at 24 h time point that were not down-regulated at the previous time point, 20 h.	2.96467e-20	2.56384e-06		Common down-regulated transcripts in fibroblasts expressing either XP/CS or TDD mutant forms of ERCC3 [Gene ID=2071], after UVC irradiation.	7.3077e-12	4.77372e-15
Genes from common regions of gains observed in more than 15% of 148 primary breast cancer tumors.	5.40421e-17	0.0138309		Genes up-regulated in U2OS cells (osteosarcoma) upon knockdown of HDAC3 [Gene ID=8841] by RNAi.	1.74689e-09	4.91255e-09
TEAD1 Peaks (269)				Peaks without motif (803)
GO Biological Processes	P-value	FDR		GO Biological Processes	P-value	FDR
blood vessel morphogenesis	9.32712e-06	8.05865e-05		positive regulation of defense response	2.93353e-05	0.0430146
angiogenesis	4.91618e-05	0.000689828		intracellular receptor mediated signaling pathway	0.000207943	0.00892881
blood vessel development	5.29364e-05	0.000253382		positive regulation of cell adhesion	0.000614369	0.00388679
Disease Ontology				Disease Ontology
malignant neoplasm of pancreas	1.01716e-07	2.20467e-05		malignant neoplasm of ovary	7.58278e-07	0.0436737
malignant neoplasm of female genital organ	1.31025e-07	0.00262728
pancreatic neoplasm	1.42789e-07	1.49302e-05
mature B-cell lymphocytic neoplasm	1.77547e-07	0.000607112
female reproductive cancer	1.88178e-07	0.00322945
Pathway Commons				Pathway Commons
IFN-gamma pathway	2.41685e-06	0.0280805		IL2 signaling events mediated by PI3K	1.93794e-08	0.00329443
ATF-2 transcription factor network	0.000168525	0.0357944		IL2-mediated signaling events	9.53206e-08	0.00257424
Syndecan-2-mediated signaling events	0.000256287	0.0386577		BMP receptor signaling	1.47772e-07	0.00218712
Noncanonical Wnt signaling pathway	0.000401182	0.0335742		TNF receptor signaling pathway	3.89195e-07	0.00190543
Canonical Wnt signaling pathway	0.000689755	0.0472115		IL1-mediated signaling events	4.08153e-06	0.00378818
MSigDB Perturbation				MSigDB Perturbation
Genes down-regulated in UB27 cells (osteosarcoma) at 12 hr after inducing the expression of a mutated form of WT1 [Gene ID=7490].	3.86852e-08	0.000871499		Genes down-regulated in luminal-like breast cancer cell lines compared to the mesenchymal-like ones.	3.36498e-22	1.09296e-17
Genes down-regulated in UB27 cells (osteosarcoma) at 8 hr after inducing the expression of a mutant form of WT1 [Gene ID=7490].	5.93884e-08	0.00172485		Genes down-regulated in luminal-like breast cancer cell lines compared to the basal-like ones.	2.67909e-19	9.09852e-10
HOXA9 [Gene ID=3205] targets down-regulated in hematopoietic stem cells.	1.69778e-07	0.0228246		Genes down-regulated in UB27 cells (osteosarcoma) at 12 hr after inducing the expression of a mutated form of WT1 [Gene ID=7490].	2.25245e-16	2.54183e-05
Genes down-regulated in luminal-like breast cancer cell lines compared to the mesenchymal-like ones.	1.12718e-06	6.05837e-10		Genes whose expression positively correlated with sensitivity of breast cancer cell lines to dasatinib [PubChem=3062316].	1.65453e-15	9.20875e-05
Genes associated with migration rate of 40 human bladder cancer cells.	1.20722e-06	5.4146e-05		Genes up-regulated in anaplastic thyroid carcinoma (ATC) compared to normal thyroid tissue.	4.97088e-15	8.93392e-07
